# Supplementary material
Source: HighWire-hosted journal article supplement (http://molpharm.aspetjournals.org/highwire/filestream/76873/field_highwire_adjunct_files/2/Bhave_SuppFig._3.pdf)
Supplement: Bhave_SuppFig._3.pdf [file Bhave_SuppFig._3.pdf]

**Development of a selective small-molecule inhibitor of Kir1.1, the Renal Outer Medullary Potassium Channel.** Gautam Bhave, Brian A. Chauder, Wen Liu, Eric S. Dawson, Rishin Kadakia, Thuy, T. Nguyen, L. Michelle Lewis, Jens Meiler, C. David Weaver, Lisa M. Satlin, Craig W. Lindsley, and Jerod S. Denton. *Molecular Pharmacology*.

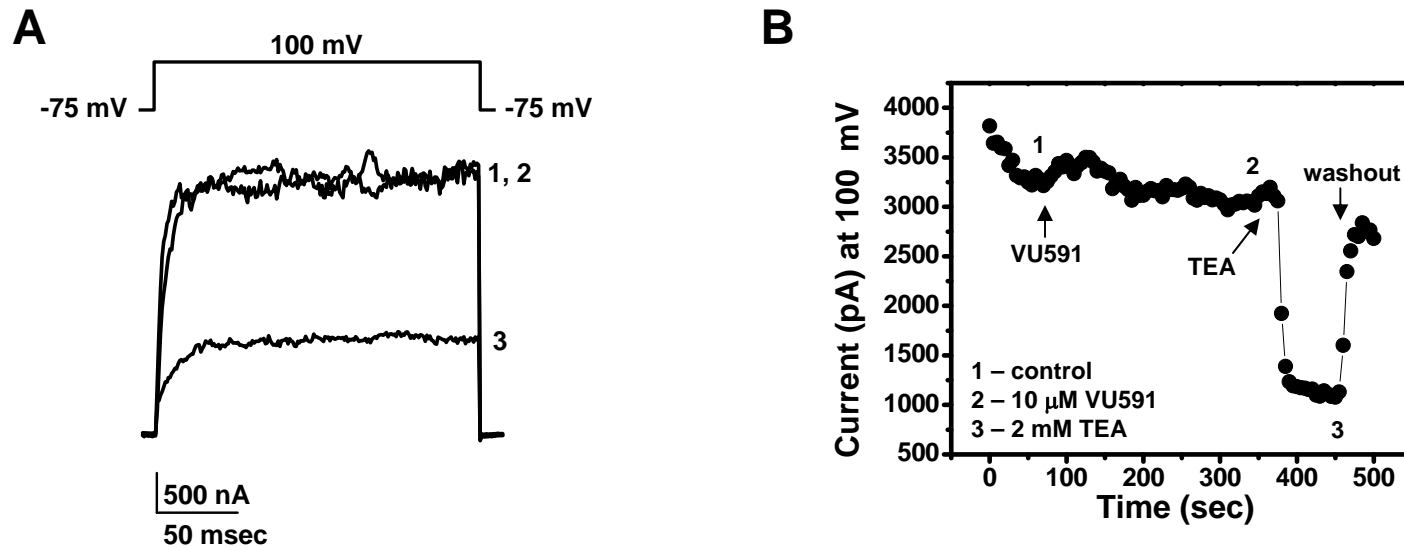

**Supplemental Figure 3.** (A) Representative BK Slo1/b1 current traces evoked from HEK-293 cells using the voltage clamp protocol shown. Current traces 1 (control), 2 (10  $\mu$ M VU591) and 3 (2 mM TEA) were taken from the time course experiment shown in (B) where indicated with the corresponding numbers.
